# Supplementary material for: Molecular fractionation of a soil fulvic acid (FA) and competitive sorption of trace metals (Cu, Zn, Cd, Pb) in hematite–solution systems: effect of the FA-to-mineral ratio
Source: Royal Society of Chemistry journal article supplement (doi:10.1039/c7ra06838g), 2017-01-01
Supplement: c7ra06838g1.pdf [file c7ra06838g1.pdf]

**Molecular fractionation of a soil fulvic acid (FA) and competitive sorption of trace metals  
(Cu, Zn, Cd, Pb) in hematite-solution systems: effect of the FA-to-mineral ratio.**

GUILLAUME FLEURY\*, MIRELLA DEL NERO AND REMI BARILLON

Institut Pluridisciplinaire Hubert Curien, UMR 7178 CNRS/UdS, 23 rue du Loess, BP 28, 67037  
Strasbourg Cedex 2, France

*Corresponding author: Guillaume Fleury*  
*E-Mail: guillaume.fleury@iphc.cnrs.fr*  
*Phone: 33 3 88 10 61 68*

**Supporting information: 4 figures**

**Fig. S1:** Percentage of PPH organic carbon sorbed onto hematite ( $r = 1.4 \text{ mgC/m}^2$ ).

**Fig. S2:** Negative ion ESI mass spectra in the ranges 120-400 m/z and 400-798 m/z of (a) PPH native solution (excerpted from Fleury et al. <sup>21</sup>), and (b) the supernatant of PPH sorption experiment onto hematite at pH 3.9 and  $r = 1.4$ .

**Fig. S3:** VK diagram showing elemental formulae assigned to ESI(-) FTMS peaks detected at pH 3.9 on the ranges 120-400 m/z (a) and 400-798m/z (b) for the PPH native solution. Excerpted from Fleury et al. <sup>21</sup>.

**Fig. S4:** Results of experiments of competitive Cu sorption (with Pb, Zn and Cd as possible competitors) onto 0.375g/L hematite in the absence of PPH, and of competitive and single Cu sorption for an initial PPH-to-mineral ratio of  $0.1 \text{ mgC/m}^2$ .

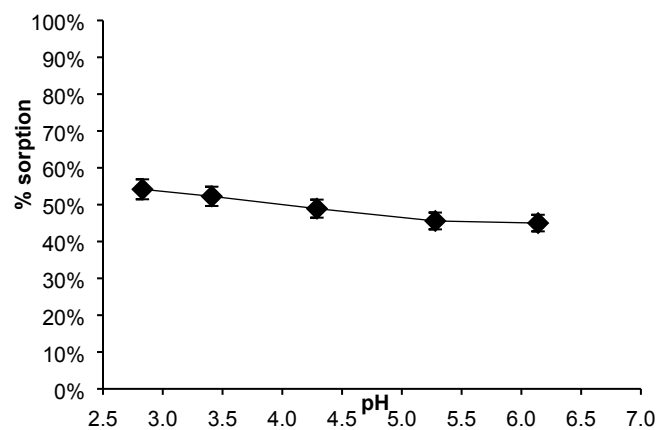

**Fig. S1:** Percentage of PPH organic carbon sorbed onto hematite ( $r = 1.4 \text{ mgC/m}^2$ ).

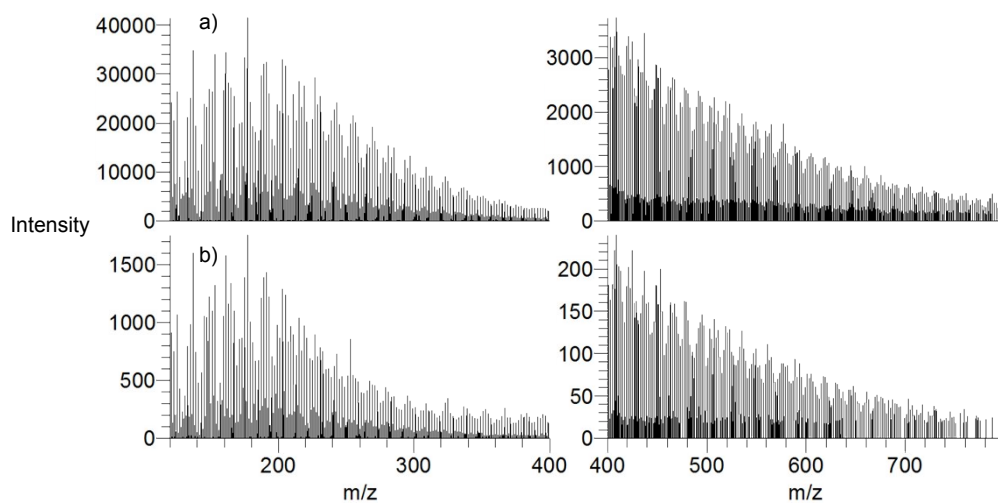

**Fig. S2:** Negative ion ESI mass spectra in the ranges 120-400 m/z and 400-798 m/z of (a) PPH native solution (excerpted from Fleury et al. <sup>21</sup>) and (b) the supernatant of PPH sorption experiment onto hematite at pH 3.9 and  $r = 1.4$ .

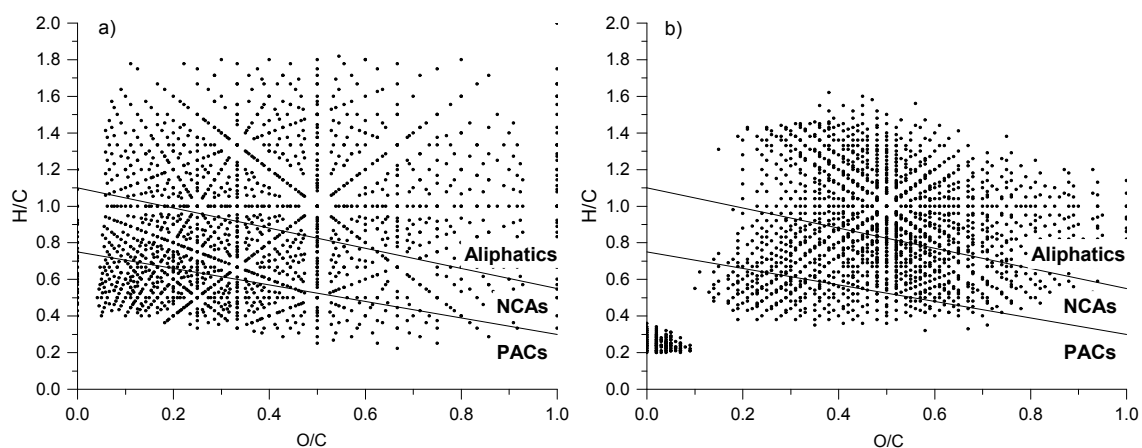

**Fig. S3:** VK diagram showing elemental formulae assigned to ESI(-) FTMS peaks detected at pH 3.9 on the ranges 120-400 m/z (a) and 400-798m/z (b) for the PPH native solution. Excerpted from Fleury et al. <sup>21</sup>.

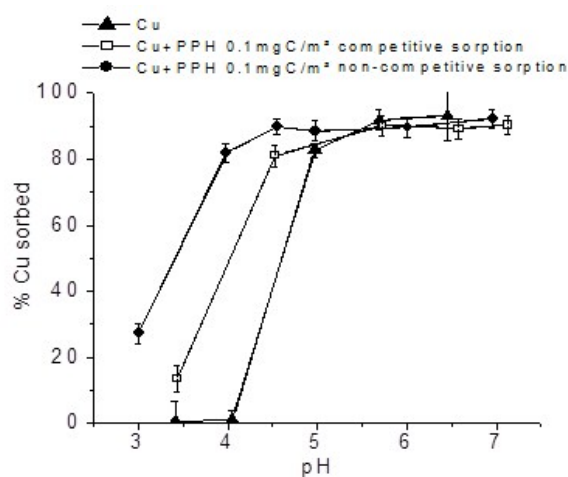

**Fig. S4:** Results of experiments of competitive Cu sorption (with Pb, Zn and Cd as possible competitors) onto 0.375g/L hematite in the absence of PPH, and of competitive and single Cu sorption for an initial PPH-to-mineral ratio of 0.1 mgC/m<sup>2</sup>.
